# Supplementary material for: Multiple myeloma cells alter the senescence phenotype of bone marrow mesenchymal stromal cells under participation of the DLK1-DIO3 genomic region
Source: PubMed Central journal article supplement (PMC4336751; doi:10.1186/s12885-015-1078-3), 2015-02-18
Supplement: 12885_2015_1078_MOESM3_ESM.pdf [file 12885_2015_1078_MOESM3_ESM.pdf]

### Additional File 3: Supplemental Methods

**Table S2: Primers used in this study**

| Name        | Sequence                                                   | Application    | Fragment size | Accession number*                                                          |
|-------------|------------------------------------------------------------|----------------|---------------|----------------------------------------------------------------------------|
| Poly(T)-VN  | GCGAGCACAGAATTAATACGACTCACTATAGG(T) <sub>12</sub> VN*      | cDNA synthesis | -             | -                                                                          |
| Cyclin E1   | 5'-CCTGGATGTTGACTGCCTTG<br>5'- ATGTCGCACCACTGATACCC        | qPCR           | 114           | NM_001238                                                                  |
| Cyclin D1   | 5'- GATCAAGTGTGACCCGGACT<br>5'-GGGTCCATGTTCTGCTGG          | qPCR           | 96            | NM_053056                                                                  |
| p16         | 5'- CACCAGCGTGTCAGGAAG<br>5'- GCCGATCCAGGTCATGATG          | qPCR           | 128           | NM_00077/<br>NM_001195132                                                  |
| p21         | 5'- CACTGTCTTGACCCTGTGC<br>5'- GGTAGAAATCTGTCATGCTGG       | qPCR           | 114           | NM_001220778/<br>NM_001220777/<br>NM_078467/<br>NM_000389/<br>NM_001291549 |
| GAPDH       | 5'- GAAATCCCATCACCATCTTCC<br>5'- CAAATGAGCCCCAGCCTTC       | qPCR           | 123           | NM_002046/<br>NM_001289745/<br>NM_001289746/<br>NM_001256799               |
| hsa-miR-16  | 5'- TAGCAGCACGTAAATATTGGCGAA<br>5'- GCGAGCACAGAATTAATACGAC | qPCR           | 58            | MI0000070                                                                  |
| hsa-miR-221 | 5'- GCTACATTGTCTGCTGGGTTTC<br>5'- GCGAGCACAGAATTAATACGAC   | qPCR           | 56            | MI0000298                                                                  |
| hsa-miR-126 | 5'- TCGTACCGTGAGTAATAATGCG<br>5'- GCGAGCACAGAATTAATACGAC   | qPCR           | 56            | MI0000471                                                                  |

|                             |                                                                |      |     |              |
|-----------------------------|----------------------------------------------------------------|------|-----|--------------|
| hsa-miR-223                 | 5'- TGTCAGTTTGTCAAATACCCAAA<br>5'- GCGAGCACAGAATTAATACGAC      | qPCR | 58  | MI0000300    |
| hsa-miR-485-5p              | 5'- GGCTGGCCGTGATGAATTC<br>5'- GCGAGCACAGAATTAATACGAC          | qPCR | 53  | MIMAT0002175 |
| hsa-miR-519d                | 5'- CAAAGTGCCTCCCTTTAGAGTG<br>5'- GCGAGCACAGAATTAATACGAC       | qPCR | 56  | MI0003162    |
| 5.8 S rRNA                  | 5'- CTACGCCTGTCTGAGCGTCGCTT<br>5'- GCGAGCACAGAATTAATACGAC      | qPCR | 57  | NR_003285    |
| DLK1-DIO3<br>(methylated)   | 5'- GTTAGTAATCGGGTTTGTCGGC<br>5'- AATCATAACTCCGAACACCCGCG      | qMSP | 160 | -            |
| DLK1-DIO3<br>(unmethylated) | 5'- GAGGATGGTTAGTTATTGGGGT<br>5'- CCACCATAACCAACACCCTATAATCACA | qMSP | 120 | -            |
| C19MC<br>(methylated)       | 5'- TGACGTCGTTACGTTTTGGA<br>5'- TAAACCGAAAAACGCGCG             | qMSP | 106 | -            |
| C19MC<br>(unmethylated)     | 5'- TGATGTTGTTATGTTTTGGATTGAG<br>5'- AAACACACACCAACACCTCATAACA | qMSP | 97  | -            |

\* according to UCSC, NCBI and miRBase

**Table S3: Cycling conditions for qPCR**

| Step         | Temperature [°C] | Time [s]                 | Cycles |
|--------------|------------------|--------------------------|--------|
| Denaturation | 95               | 600                      |        |
| Denaturation | 95               | 15                       | x 45   |
| Annealing    | 59-60            | 60                       |        |
| Melt         | 60-98            | $\Delta T +1^{\circ}C/s$ |        |

**Table S4: qBiomarker Assays used for CN variation analysis**

| Cluster       | Assay           | Genomic Region            | Gene         |
|---------------|-----------------|---------------------------|--------------|
| DLK1-DIO3     | VPH114-0506637A | chr14:101327201-101327400 | MEG3         |
|               | VPH114-0507099A | chr14:101419601-101419800 | LOC100507242 |
|               | VPH114-0507682A | chr14:101536201-101536400 | LOC100507257 |
| C19MC         | VPH119-0270702A | chr19:54140201-54140400   | DPRX         |
|               | VPH119-0271054A | chr19:54210601-54210800   | MIR520C      |
|               | VPH119-0307173A | chr19:54296838-54297302   | NLRP12       |
| Normalisation | VPH000-0000000A |                           |              |
