# Supplementary material for: Multiple myeloma cells alter the senescence phenotype of bone marrow mesenchymal stromal cells under participation of the DLK1-DIO3 genomic region
Source: BMC Cancer. 2015 Feb 18;15:68. doi: 10.1186/s12885-015-1078-3 (PMC4336751; doi:10.1186/s12885-015-1078-3)
Supplement: Additional file 1: Table S1. — Patients and Donor characteristics. [file 12885_2015_1078_MOESM1_ESM.pdf]

## Additional File 1

**Table S1: Patients and Donor characteristics**

| Patients/Donors              | Total Patients (n=89) | Newly diagnosed MM (ND-MM-BMMSCs; n=54) | Relapsed MM (R-MM-BMMSCs; n=35) | Donors (n=12) |
|------------------------------|-----------------------|-----------------------------------------|---------------------------------|---------------|
| Median Age                   | 64.5 (33-85)          | 66 (33-85)                              | 62 (44-84)                      | 65 (43-75)    |
| Sex (n; count)               |                       |                                         |                                 |               |
| Male                         | 56 (62.9%)            | 35 (64.8%)                              | 21 (60.0%)                      | 8 (66.7%)     |
| Female                       | 33 (37.1%)            | 19 (35.2%)                              | 14 (40.0%)                      | 4 (33.3%)     |
| Paraprotein isotype          |                       |                                         |                                 |               |
| IgG                          |                       | 32 (59.3%)                              | 18 (51.4%)                      |               |
| IgA                          |                       | 8 (14.8%)                               | 3 (8.6%)                        |               |
| IgD                          |                       | 0 (0%)                                  | 1 (2.8%)                        |               |
| light chain                  |                       | 13 (24.1%)                              | 13 (37.2%)                      |               |
| asecretory                   |                       | 1 (1.8%)                                | 0 (0%)                          |               |
| Durie/Salmon state           |                       |                                         |                                 | -             |
| I                            |                       | 12 (22.2%)                              | 2 (5.8%)                        |               |
| II                           |                       | 7 (13.0%)                               | 8 (22.8%)                       |               |
| III                          |                       | 35 (64.8%)                              | 25 (71.4%)                      |               |
| Bone marrow infiltration [%] |                       | 45 (10-90)                              | 80 (10-100)                     | -             |
