# Supplementary material for: Multiple myeloma cells alter the senescence phenotype of bone marrow mesenchymal stromal cells under participation of the DLK1-DIO3 genomic region
Source: BMC Cancer. 2015 Feb 18;15:68. doi: 10.1186/s12885-015-1078-3 (PMC4336751; doi:10.1186/s12885-015-1078-3)
Supplement: Additional file 2: Figure S1. — Purity of isolated BMMSCs. BMMSCs were double stained with CD34-PE/CD90-FITC or CD45-PE/CD105-FITC. Purity of BMMSCs ranged from 94% to 99.5% in passage 1 of cell cultures. [file 12885_2015_1078_MOESM2_ESM.pdf]

## Additional File 2: Purity of isolated BMMSCs

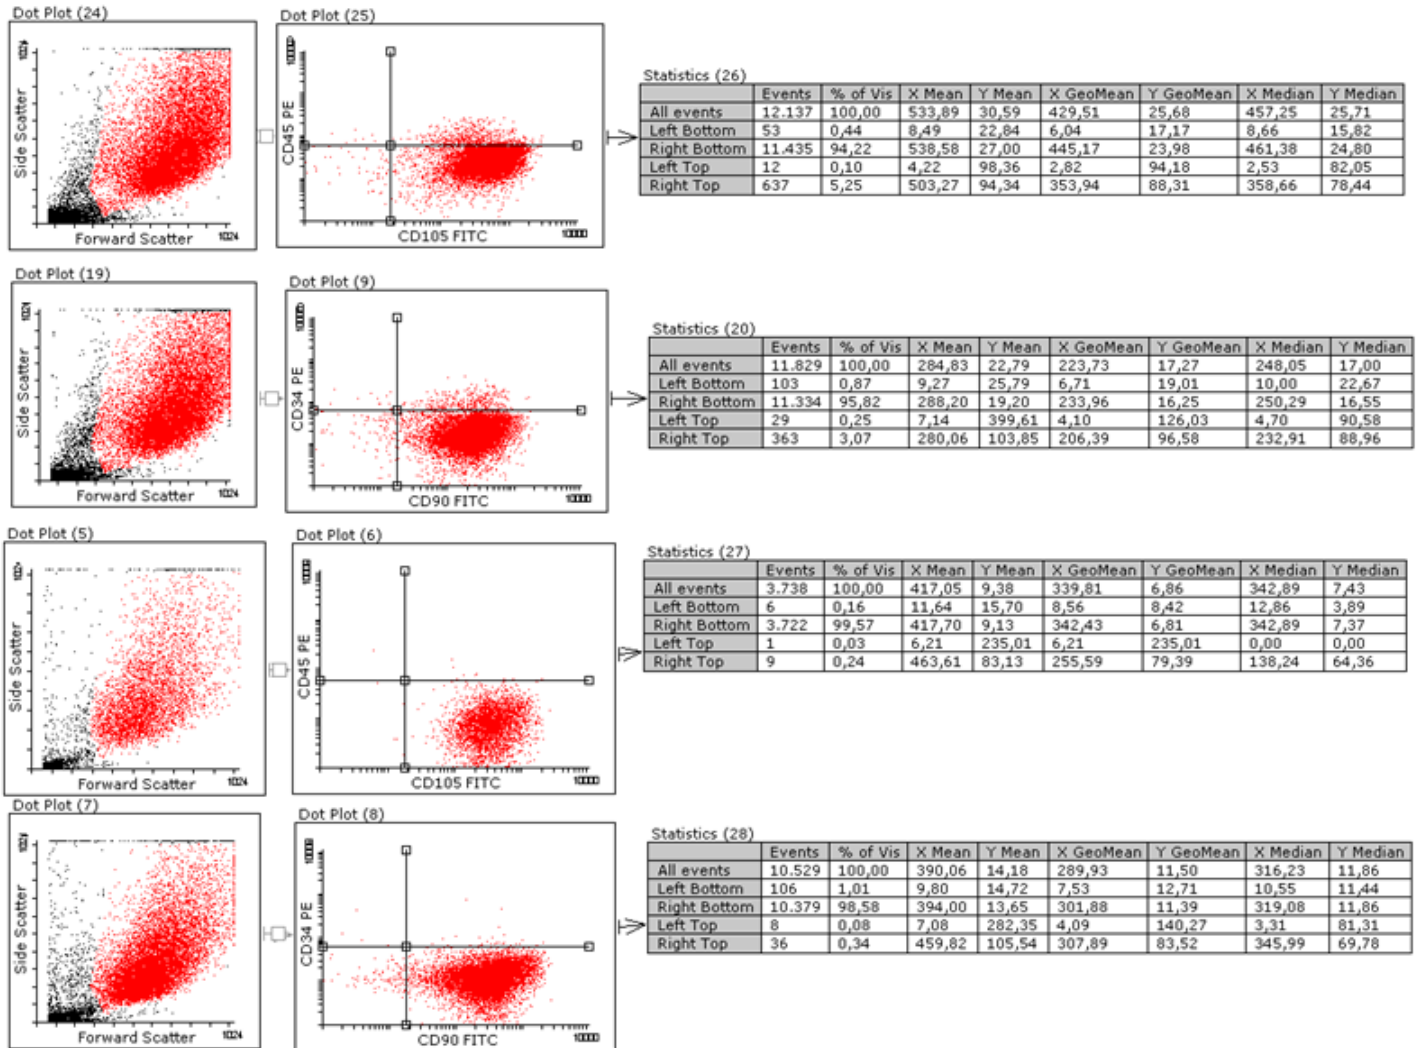

**Figure S1: Purity of isolated BMMSCs.** BMMSCs were double stained with CD34-PE/CD90-FITC or CD45-PE/CD105-FITC. Purity of BMMSCs ranged from 94% to 99.5% in passage 1 of cell cultures.
